# Supplementary material for: COVID-19 in the Brazilian Oil Capital: the successful experience of public and private engagement
Source: Research Square preprint supplement (doi:10.21203/rs.3.rs-319061/v1), 2021-03-30
Supplement: Supplementary file 1 [file 252b1340c960e776b030de53.pdf]

# COVID-19 in the Brazilian Oil Capital: the successful experience of public and private engagement

Authors:

Natália Martins Feitosa<sup>1\*</sup>, Bruno da Costa Rodrigues<sup>1\*</sup>, Ana Cristina Petry<sup>1\*</sup>, Keity Jaqueline Chagas Vilela Nocchi<sup>1</sup>, Rodrigo de Moraes Brindeiro<sup>2</sup>, Carla Zilberberg<sup>1</sup>, Cintia Monteiro-de-Barros<sup>1</sup>, Flavia Borges Mury<sup>1</sup>, Jackson de Souza Menezes<sup>1</sup>, José Luciano Nepomuceno-Silva<sup>1</sup>, Manuela Leal da Silva<sup>1</sup>, Marcio José de Medeiros<sup>1</sup>, Raquel de Souza Gestinari<sup>1</sup>, Alessandra da Silva de Alvarenga<sup>1</sup>, Allan Pierre Bonetti Pozzobon<sup>1</sup>, Carina Azevedo Oliveira Silva<sup>1</sup>, Daniele das Graças dos Santos<sup>1</sup>, Diego Henrique Silvestre<sup>1</sup>, Grazielle Fonseca de Sousa<sup>1</sup>, Janimayri Forastieri de Almeida<sup>1</sup>, Jhenifer Nascimento da Silva<sup>1</sup>, Layza Mendes Brandão<sup>1</sup>, Leandro de Oliveira Drummond<sup>1</sup>, Lupis Ribeiro Gomes Neto<sup>1</sup>, Raphael de Mello Carpes<sup>1</sup>, Renata Coutinho dos Santos<sup>1</sup>, Taynan Motta Portal<sup>1</sup>, Amilcar Tanuri<sup>2#</sup>, Rodrigo Nunes-da-Fonseca<sup>1#</sup>

\*shared first authors

\*\* shared corresponding authors

## Supplementary figures:

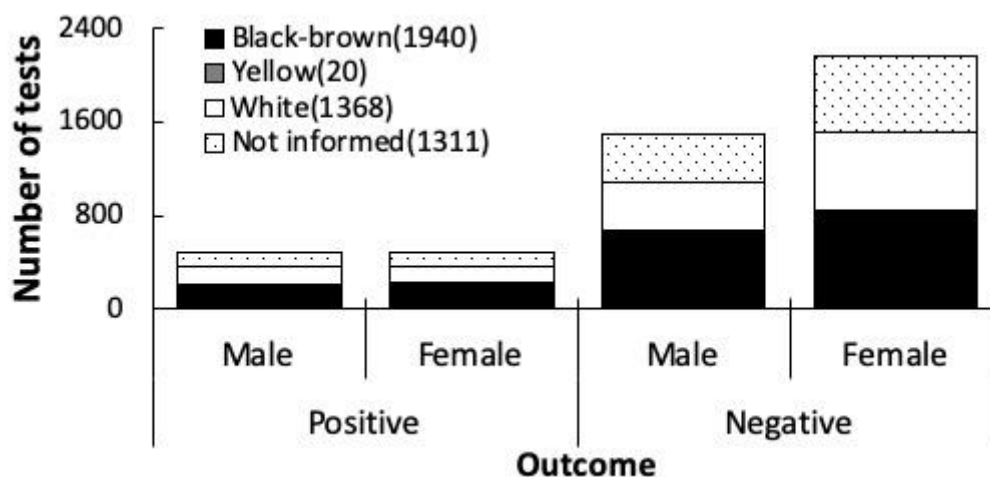

**Sup. Figure 1: Rates of the outcomes of the 4,639 COVID-19 RT-qPCR tests in Macaé, Rio de Janeiro, Brazil, according race/color (Positives = 978; Negatives = 3,661), between 13th April and 12th September 2020.** Number of tests in brackets. The 4,639 tests cover a relatively similar proportion gender for positive outcomes and it was women biased for negative outcomes. Ca. 30% of the individuals tested did not inform race/color, whereas the proportion of black and caucasians was similar.

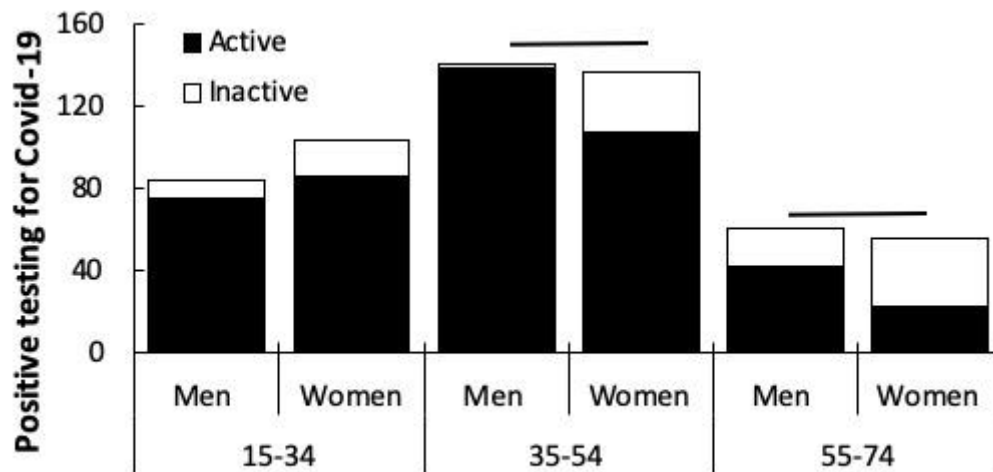

**Sup. Figure 2: Proportion among the 583 positive testing for COVID-19 RT-qPCR in Macaé, Rio de Janeiro, Brazil, between 13th April and 12th September 2020.** Only individuals confirming laboral activities during the quarantine (Men = 286; Women = 297) were considered for the analysis. The bars identify significant age classes with significant differences in proportion between gender.

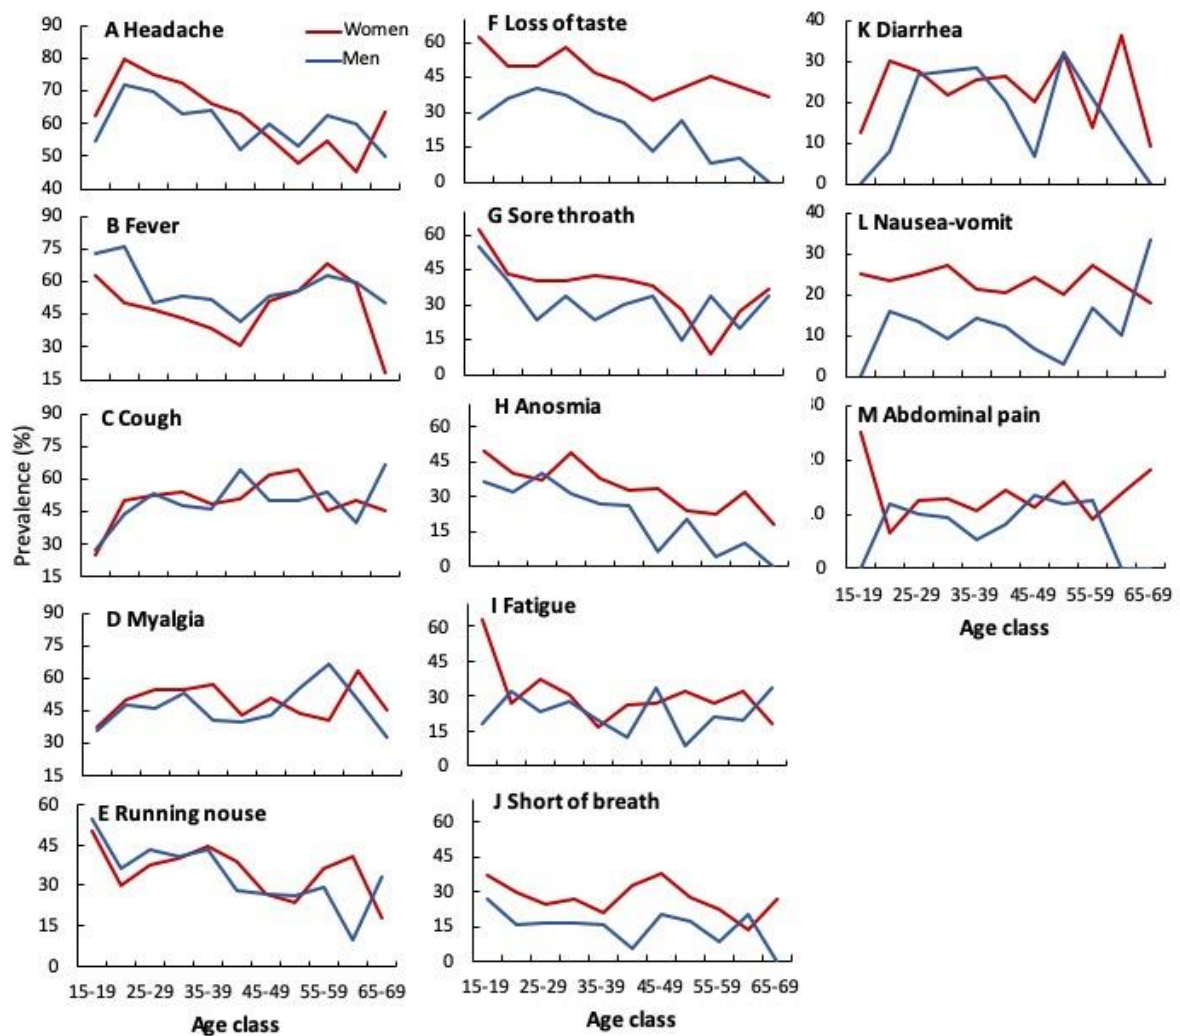

**Sup. Figure 3: Prevalence of the thirteen most reported symptoms among age classes of the 380 women and 370 men testing positive for COVID-19 at the municipal health center of Macaé, Rio de Janeiro, Brazil, between April 12th and September 12, 2020. Only age classes with more than 15 individuals are presented (omitted 0-14, 70-74, 75-79, >80).**

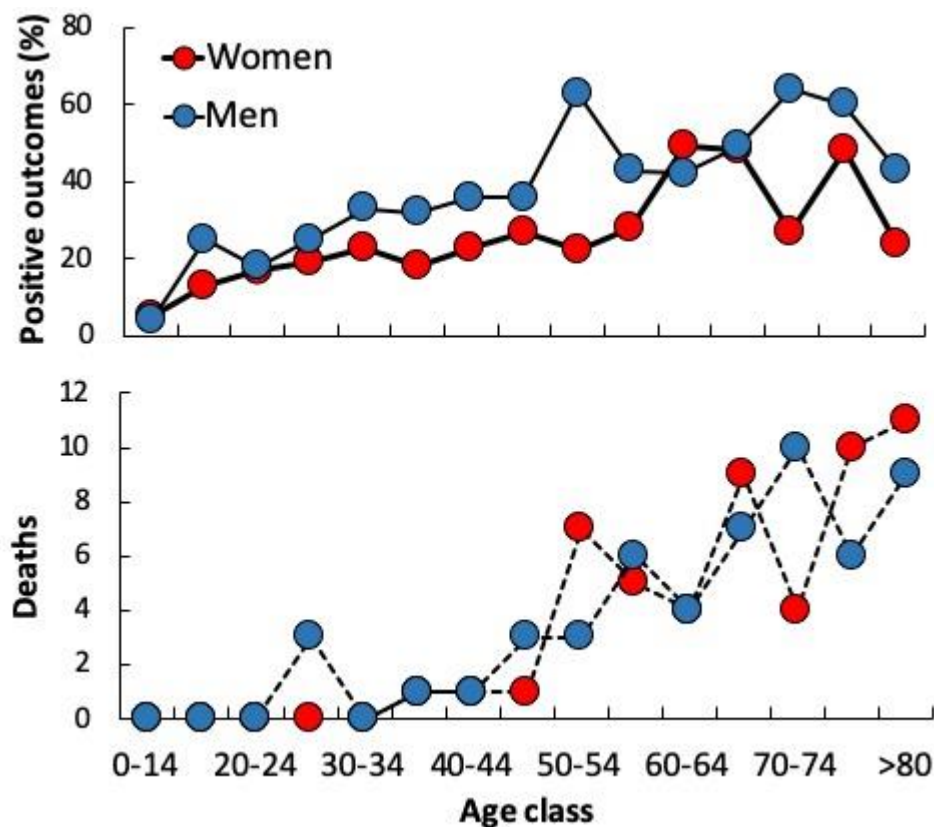

**Sup. Figure 4: Relationship between relative positive outcomes and absolute deaths within age classes among 3,487 COVID-19 RT-qPCR tests (Men = 1,510; Women = 1,977), in Macaé, Rio de Janeiro, Brazil. Data from April 12th and September 12th 2020. Irrespective of gender, positive testing and mortality increased with age.**

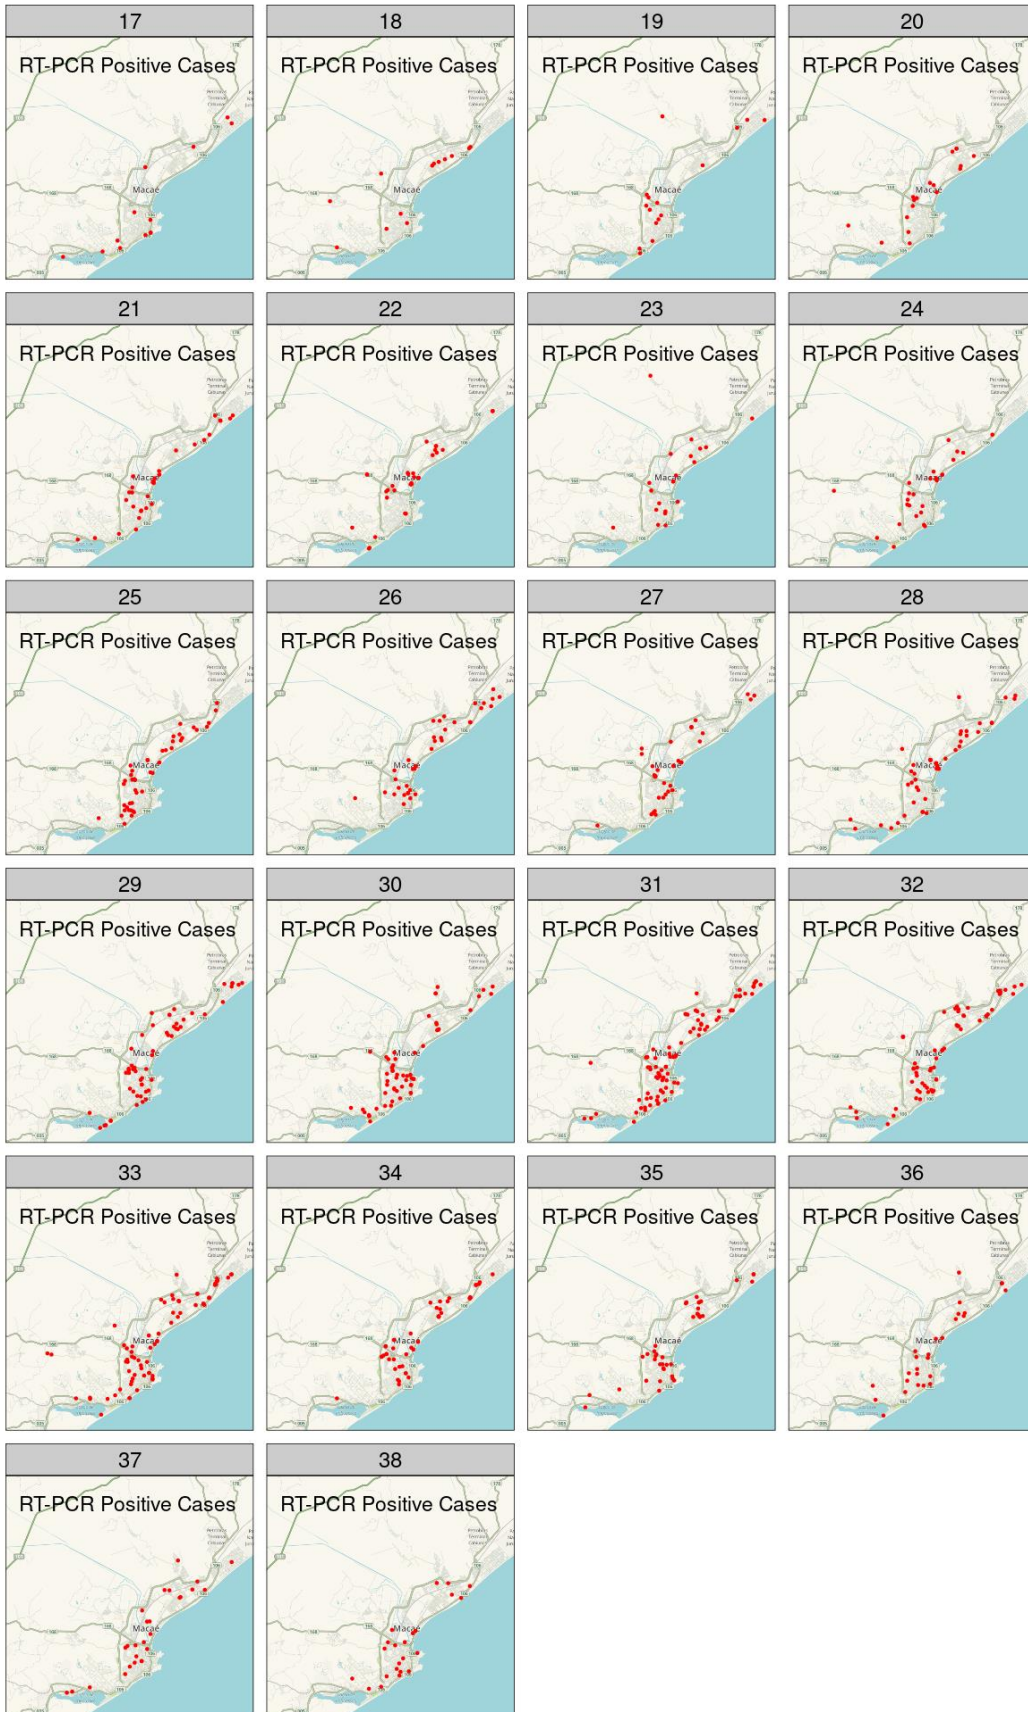

**Sup. Figure 5: Spatial distribution of positive RT-PCR week by week (17<sup>th</sup> until 38<sup>th</sup> epidemiological week) at Macaé city.**

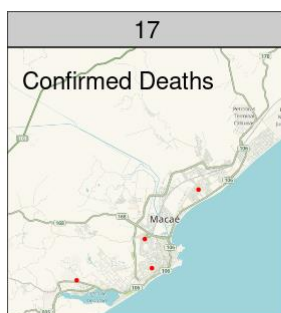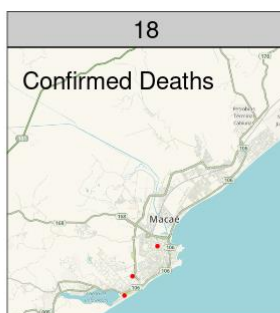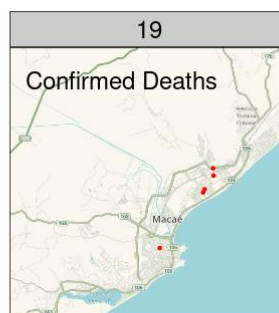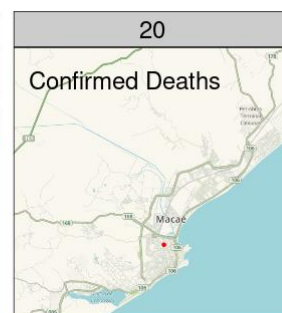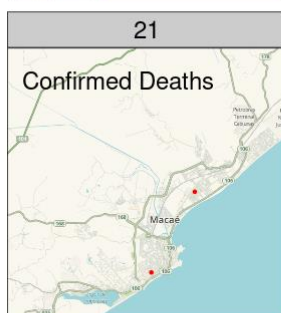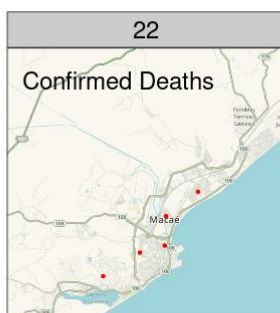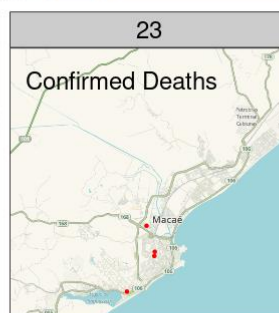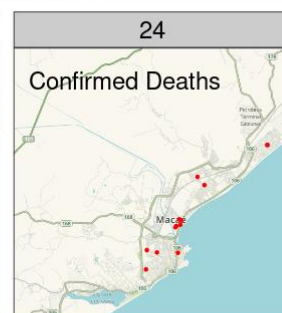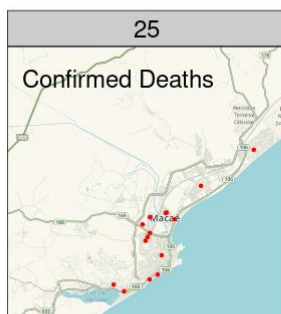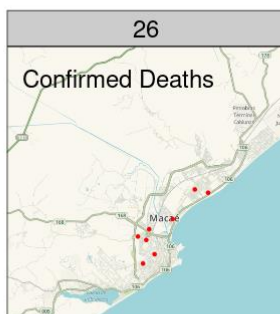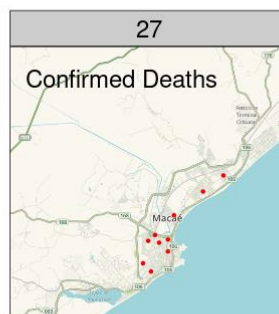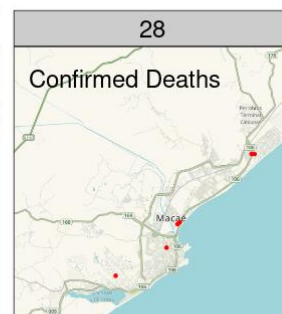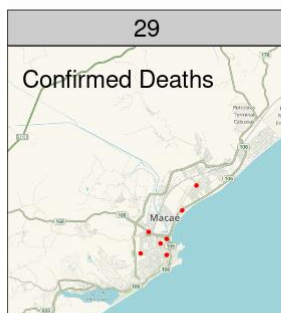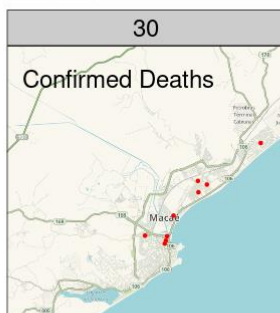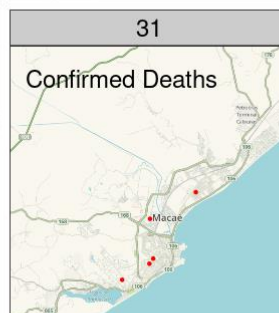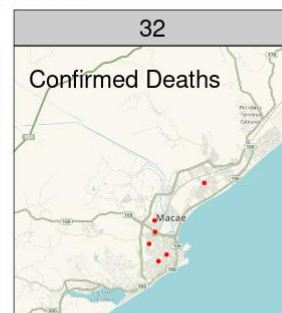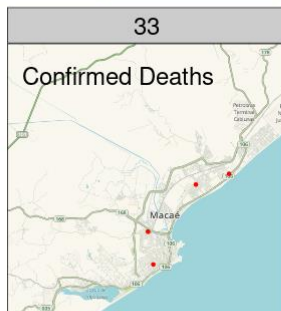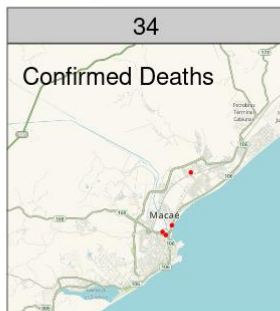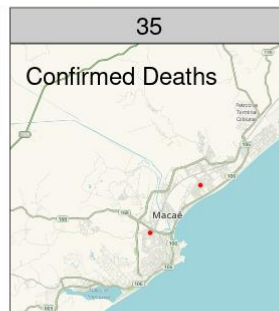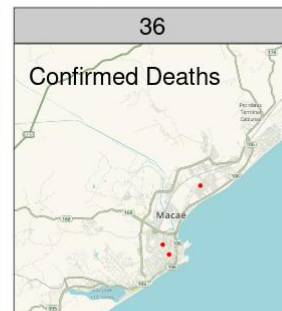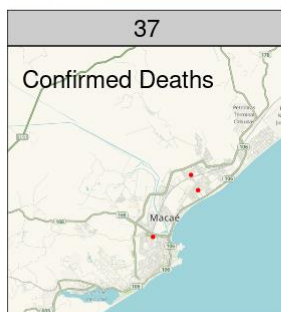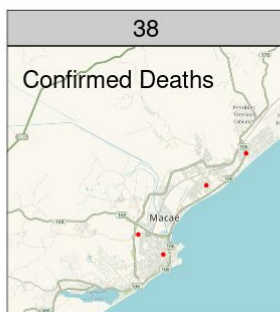

**Sup. Figure 6: Spatial distribution of deaths week by week (17<sup>th</sup> until 38<sup>th</sup> epidemiological week) at Macaé city.**

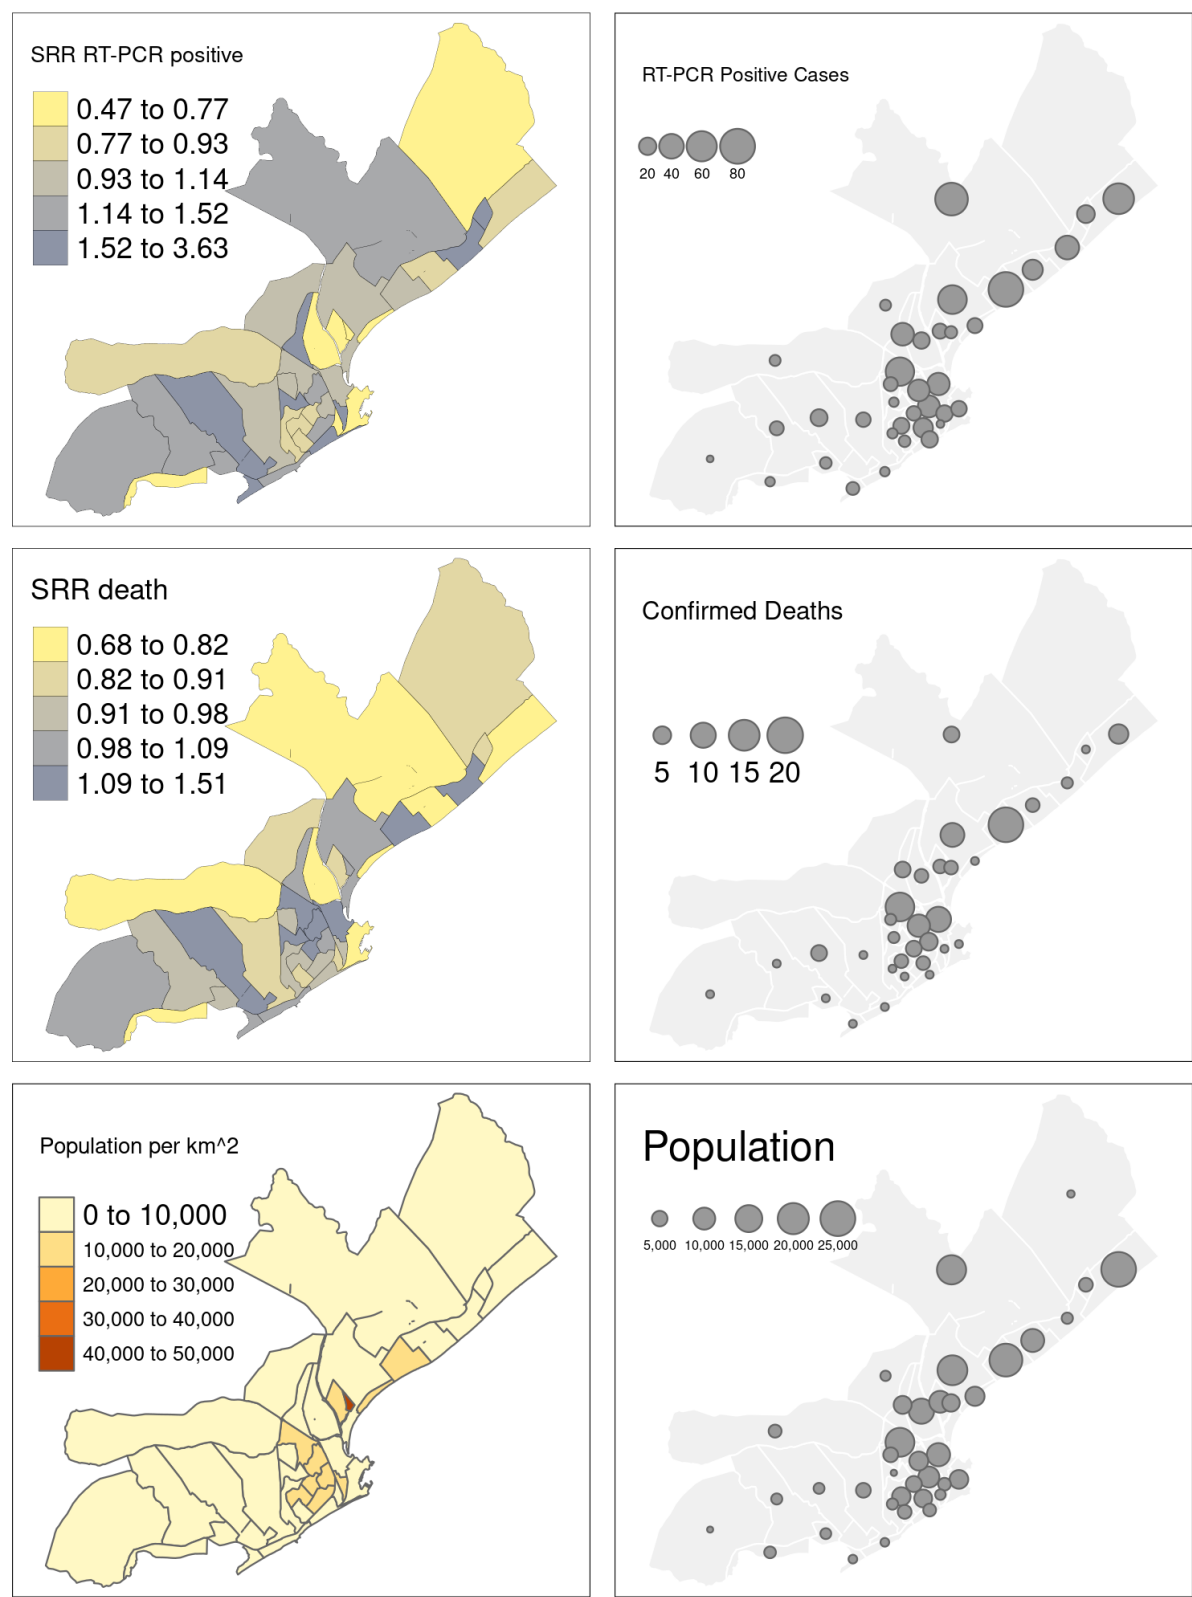

**Sup. Figure 7: Comparison of SRR values of RT-qPCR positive cases, deaths and population density of different Macaé neighborhoods.** In general, the highly populated areas also correspond to high numbers of RT-qPCR positive cases and deaths.
